# Supplementary material for: Manganese oxide nanoparticles elicit cadmium tolerance in wheat seedlings by ionomic and phenomic adjustment, regulation of AsA–GSH pathway, cellular thickness recovery, and antioxidant modulation
Source: Royal Society of Chemistry journal article supplement (doi:10.1039/d4en00490f), 2024-01-01
Supplement: d4en00490f1.pdf [file d4en00490f1.pdf]

## Supplementary Information

### LIST OF TABLES

Supplementary Table 1: ANOVA-Table of the phenotyping and root morphological traits under Cd exposure

\*Chlorophyll content measured on the 21st day after germination (Chl 21<sub>DAG</sub>), Shoot length (SL), Leaf area (LA), Plant height (PH), Relative water content (RWC), Fresh weight (FW), Dry weight (DW), Number of root tips (NRT), Root network area (NAR), Surface area of roots (SAR), Root length (RL), and Number of root tips (NRT)

| Variables                                       | Chl_21D<br>AG | SL (cm)    | LA (cm <sup>2</sup> ) | PH (cm)     | RWC         | FW (mg)      | DW (mg)    | NRT        | NAR<br>(mm <sup>2</sup> ) | SAR (mm <sup>2</sup> ) | RL (cm)    |
|-------------------------------------------------|---------------|------------|-----------------------|-------------|-------------|--------------|------------|------------|---------------------------|------------------------|------------|
| <b>Phenotypic and Root Morphological Traits</b> |               |            |                       |             |             |              |            |            |                           |                        |            |
| <b>SKD-1</b>                                    |               |            |                       |             |             |              |            |            |                           |                        |            |
| Control                                         | 31.87±0.87    | 35.6±1.35  | 10.44±0.11            | 96.46±8.49  | 74.59±3.26  | 430.93±59.78 | 40.47±7.6  | 20+5.89    | 68+30.68                  | 1095.88+187.49         | 60.86+7.83 |
| Cd<br>(50mg/kg)                                 | 33.18±1.74    | 36±0.82    | 7.53±0.73             | 91.3±12.52  | 46.77±2.39  | 357.73±16.27 | 30.67±5.92 | 21+9.27    | 71.8+7.39                 | 715.5+69.22            | 55.3+12.09 |
| CdNP100                                         | 38.16±1.1     | 26.4±0.71  | 7.22±0.83             | 63.44±0.74  | 42.22±7.28  | 257.7±26.62  | 35.86±9.13 | 25.42+0.06 | 19.66+11.55               | 761.56+1.32            | 37.04+0.13 |
| CdNP250                                         | 37.6±0.37     | 26.27±0.21 | 8.73±0.86             | 64.73±1.56  | 57.43±26.22 | 269.88±52.05 | 38.96±8.53 | 29.5+0.05  | 24.47+10.33               | 648+1.58               | 38.29+1.47 |
| CdNP500                                         | 35.53±1.88    | 26.3±1.13  | 7.49±1.39             | 64.98±2.01  | 45.94±3.92  | 246.5±5.67   | 22.9±2.08  | 24.89+0.03 | 55.03+0.47                | 957.85+1.13            | 38.68+1.09 |
| NP100                                           | 43.95±2.33    | 35.3±1.47  | 8.36±0.84             | 105.95±3.75 | 43.85±8.42  | 199.5±14.74  | 71.93±4.9  | 26.97+1.25 | 53.37+0.69                | 774.87+2.09            | 70.65+4.09 |
| NP250                                           | 41.4±1.39     | 29±2.02    | 6.55±0.27             | 103.7±4.75  | 45.42±4.7   | 191.25±14.7  | 39±4.62    | 33.25+0.95 | 63.13+0.98                | 674.5+2.98             | 74.7+3.5   |
| NP500                                           | 43.4±0.63     | 34.9±2.14  | 8.05±2.59             | 106.6±3.9   | 73.81±10.05 | 180±12.86    | 40.28±5.52 | 27.19+1.16 | 75.6+0.16                 | 993.27+8.61            | 71.7+4.59  |
| <b>P*T</b>                                      | ***           | ***        | ns                    | ***         | *           | ***          | ***        | ns         | **                        | ***                    | ***        |
| <b>Borlaug-16</b>                               |               |            |                       |             |             |              |            |            |                           |                        |            |
| Control                                         | 30.53±2.      | 36.4±0.9   | 10.18±1.              | 84.78±5.1   | 154.77±7.9  | 443.33±22.   | 45.51±4.8  | 21+11.9    | 59.28+8.1                 | 1662.37+447.           | 48.38+4.2  |

|                                                                                                                                |                |                |               |                 |                  |                  |                 |                |                 |                   |                 |
|--------------------------------------------------------------------------------------------------------------------------------|----------------|----------------|---------------|-----------------|------------------|------------------|-----------------|----------------|-----------------|-------------------|-----------------|
|                                                                                                                                | 9              | 4              | 23            | 6               | 1                | 1                | 7               |                | 9               | 65                | 2               |
| Cd<br>(50mg/kg)                                                                                                                | 30.6±0.2<br>9  | 33.53±1.<br>91 | 9.01±0.3<br>8 | 74.36±3         | 118.22±13.<br>14 | 335.53±16.<br>88 | 40.71±1.7<br>4  | 14.67±7.<br>59 | 49.67±14.<br>55 | 754.95±124.0<br>6 | 40.82±2.6<br>7  |
| CdNP100                                                                                                                        | 36.3±0.5<br>6  | 25.23±3.<br>79 | 6.13±1.8<br>8 | 65.19±4.0<br>2  | 71.92±50.5<br>3  | 209.44±62.<br>35 | 30.77±10.<br>55 | 27.69±0.<br>05 | 23.85±13.<br>73 | 787.65±1.58       | 39.96±0.6<br>5  |
| CdNP250                                                                                                                        | 30.77±0.<br>59 | 23.55±0.<br>82 | 6.07±0.6<br>9 | 54.43±0.7<br>7  | 144.05±32.<br>88 | 386.63±8.6       | 63.5±0.73       | 24.92±0.<br>05 | 50.43±0.4<br>7  | 596.59±1.58       | 30.93±0.0<br>5  |
| CdNP500                                                                                                                        | 33.4±0.8<br>6  | 25.9±1.4<br>4  | 8.3±1.1       | 91.84±2.1<br>9  | 96.35±9.32       | 283.33±14.<br>4  | 43.78±2.1<br>1  | 34.59±0.<br>04 | 62.17±0.3<br>4  | 964.26±2.25       | 65.94±0.7<br>4  |
| NP100                                                                                                                          | 41.95±0.<br>7  | 35.4±2.1<br>7  | 8.37±0.4<br>7 | 117.15±3.<br>3  | 76.02±12.6<br>2  | 234±12.05        | 50.63±5.4<br>8  | 28.6±3.0<br>2  | 29.27±0.2<br>6  | 812.99±0.8        | 81.75±5.3<br>5  |
| NP250                                                                                                                          | 48.95±2.<br>15 | 29.1±2.4<br>6  | 5.92±1.6<br>5 | 117.6±5.8<br>5  | 55.68±8.73       | 212.25±12.<br>9  | 42±6.45         | 26.63±0.<br>21 | 52.7±0.08       | 619.4±0.99        | 88.5±6.9        |
| NP500                                                                                                                          | 53.35±2.<br>95 | 32.6±2.3<br>4  | 8.52±1.9      | 133.85±4.<br>51 | 50.81±0.42       | 262.5±11.9<br>5  | 46.5±4.62       | 37.43±0.<br>39 | 70.8±0.16       | 1005.5±0.36       | 101.25±6.<br>62 |
| <b>P*T</b>                                                                                                                     | ***            | ***            | *             | ***             | **               | ***              | **              | *              | ***             | ***               | ***             |
| <b>P*Cv</b>                                                                                                                    | ns             | ns             | ns            | ns              | ***              | *                | ns              | ns             | ns              | ns                | *               |
| ns=non-significant, *=p<0.05, **=p<0.01, ***=p<0.001, P*T= Probability between treatments, P*Cv= Probability between cultivars |                |                |               |                 |                  |                  |                 |                |                 |                   |                 |

**Supplementary Table 2: FTIR analysis of green synthesized MnO<sub>2</sub> NP**

| <b>Peak Values (cm<sup>-1</sup>)</b> | <b>Strength</b> | <b>Functional Groups</b> | <b>Interpretations</b> |
|--------------------------------------|-----------------|--------------------------|------------------------|
| 1734.4                               | Strong          | C=O stretching           | Aldehyde               |
| 1363.56                              | Medium          | O-H bending              | Phenol                 |
| 1216.36                              | Strong          | C-O stretching           | Vinyl Ether            |
| 518.4                                | Strong          | C-Br                     | Halo Compound          |

**Supplementary Table 3: Rietveld Refinement Parameters and Goodness of Fit for MnO<sub>2</sub> Nanoparticles (MnO<sub>2</sub>NPs)**

| <b>Parameters</b>                      | <b>Values</b> |
|----------------------------------------|---------------|
| Crystallite size (Rietveld Refinement) | 41 nm         |
| $R_{wp}$                               | 109           |
| $R_p$                                  | 130           |
| Goodness of fit                        | 2.36          |
| $\chi^2$                               | 2.36          |
| Bragg R-factor                         | 11.71         |
| RF-factor                              | 6.902         |

## LIST OF FIGURES

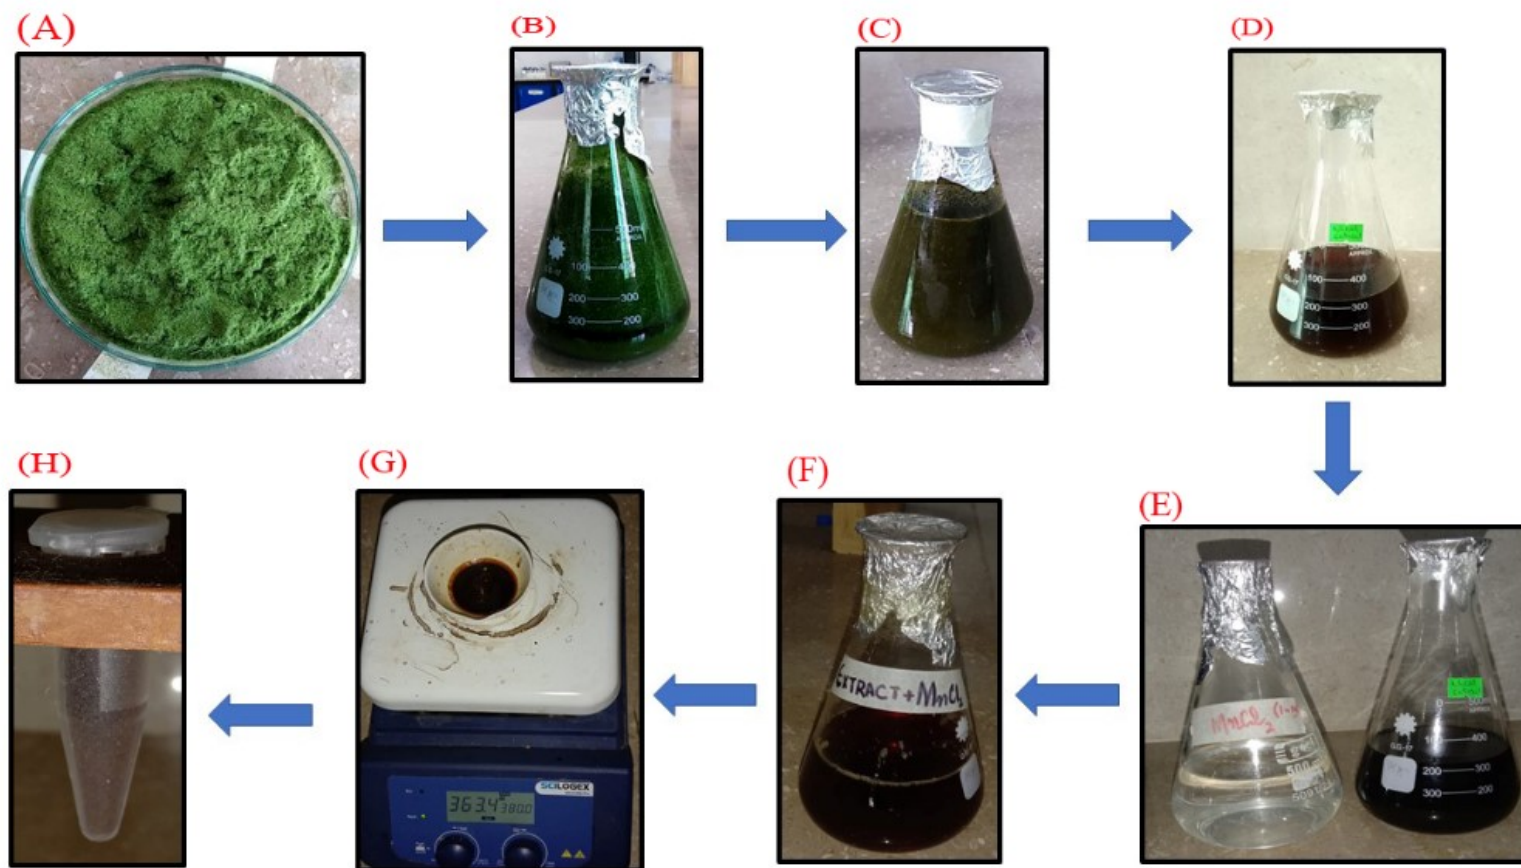

**Supplementary Figure 1: Schematic sketch of green synthesis of MnO<sub>2</sub> NP**

(A) Grinded Wheat powder (B) Wheat powder in dH<sub>2</sub>O (C) Complete mixture of Wheat powder and dH<sub>2</sub>O (D) Cell free Wheat extract after filtration (E) Wheat extract (Right) and 1mM MnCl<sub>2</sub> solution (Left) (F) 1:1 Mixture of MnCl<sub>2</sub> and Wheat extract (G) Paste formation in China dish (H) Pure MnO<sub>2</sub> NP in China dish after furnace.

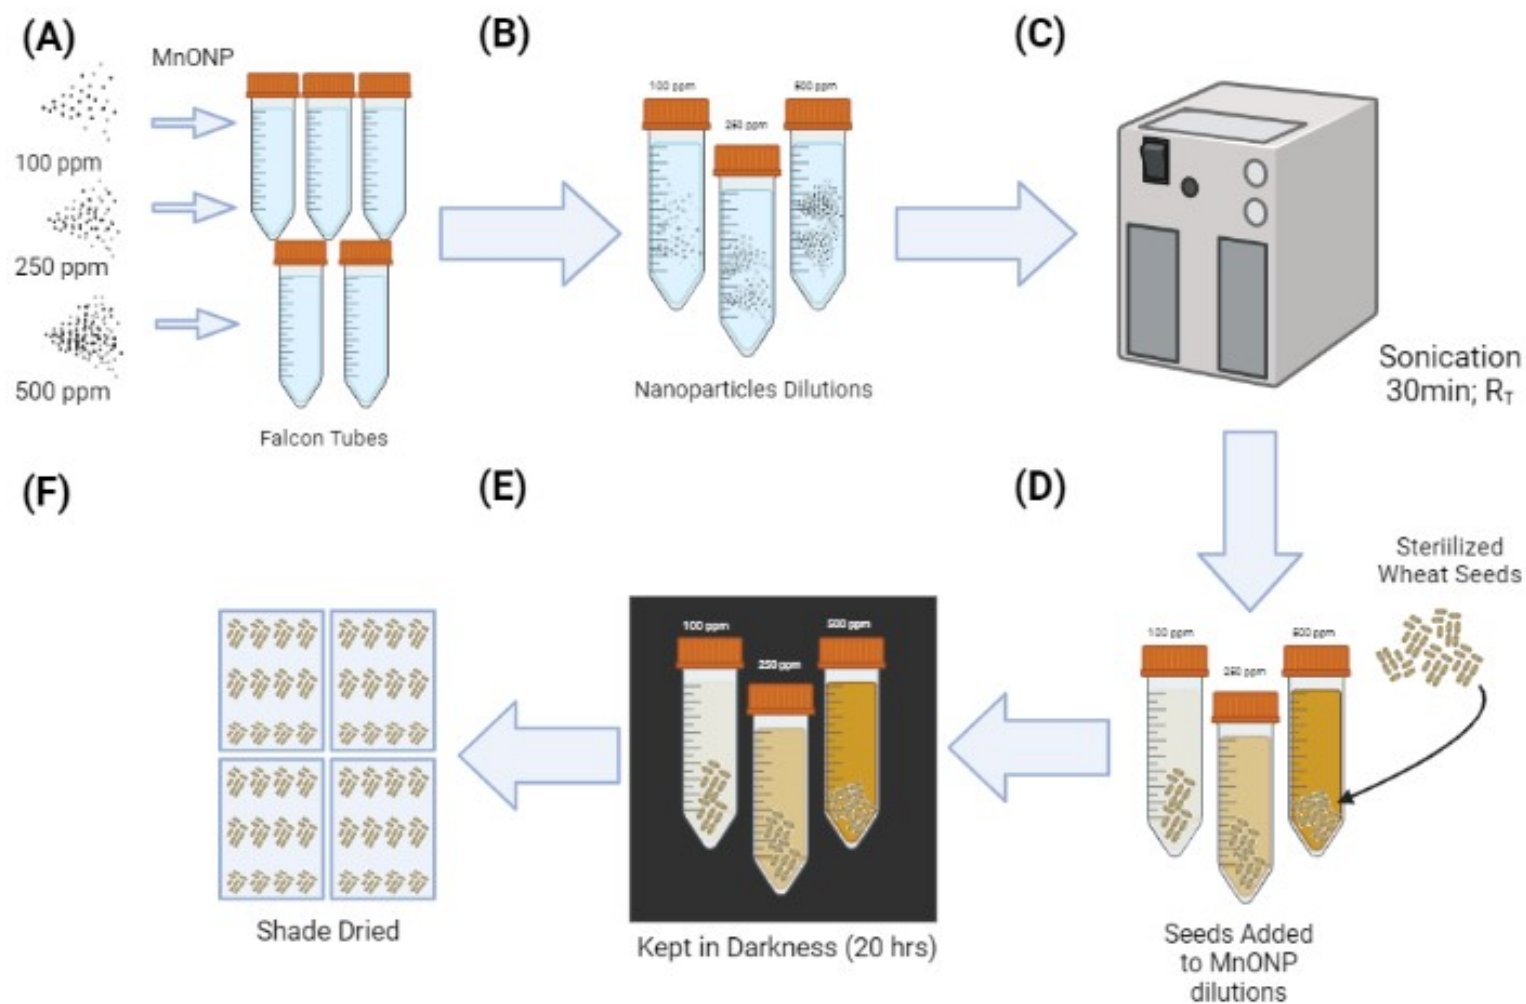

**Supplementary Figure 2: Mechanism of Nanopriming Wheat Seeds with MnO<sub>2</sub> NP**

*(A) Different dilutions of MnO<sub>2</sub> NP and 50mL falcon tubes are taken (B) Various suspensions of MnO<sub>2</sub> NP are made in dH<sub>2</sub>O (C) Sonication is performed at room temperature for 30min (D) Surface sterilized Wheat seeds are added to MnO<sub>2</sub> NP dilutions and (E) kept in darkness for 20hrs (F) Nanoprimed seeds are shade dried.*

\*

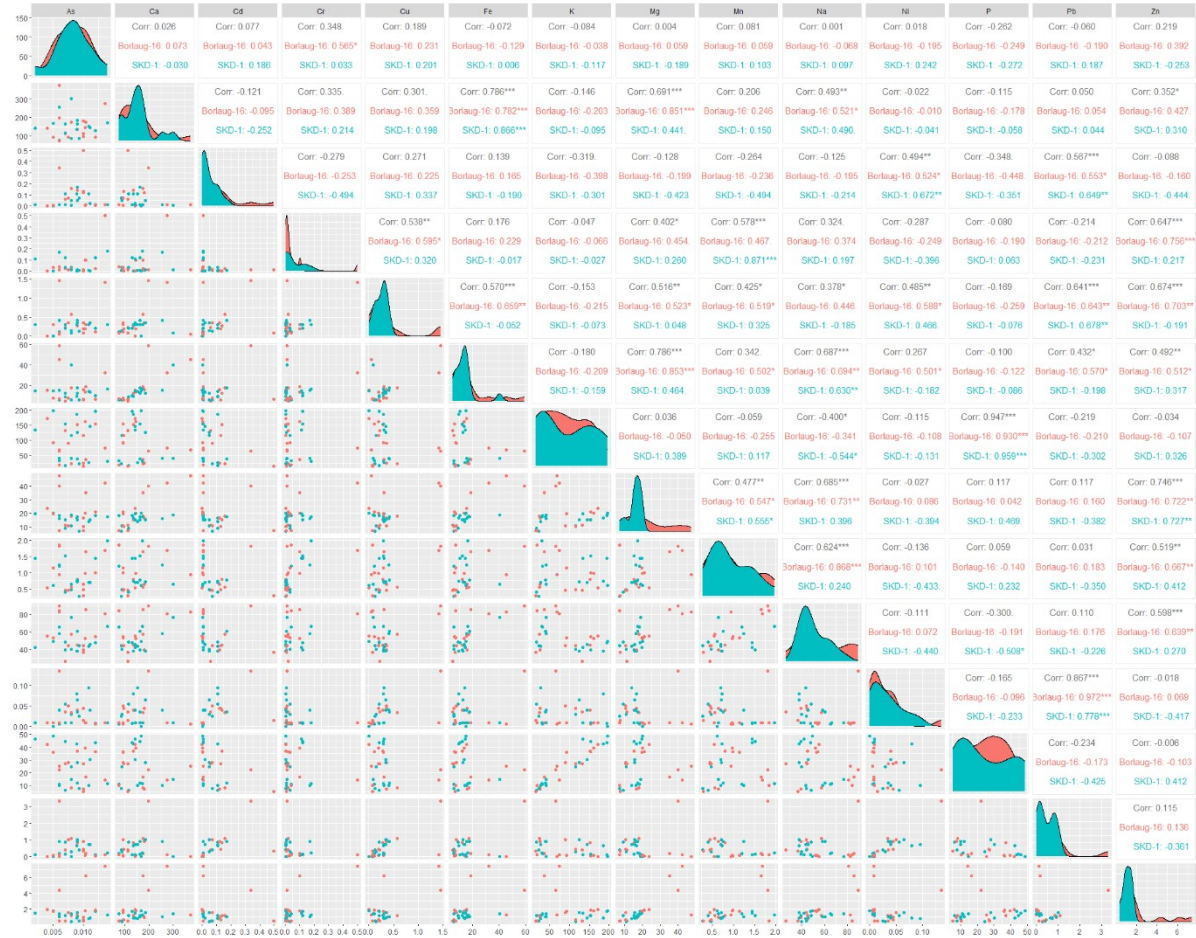

**Supplementary Figure 3: Q-Q Scatter Plot, Histograms, and coefficient of correlation between Ionome of both cultivars**

The lower triangle represents Q-Q Scatter plot of Phenotypic traits, the upper triangle represents coefficient of correlation values, and the middle line dissecting the two triangles represents histograms of both cultivars.

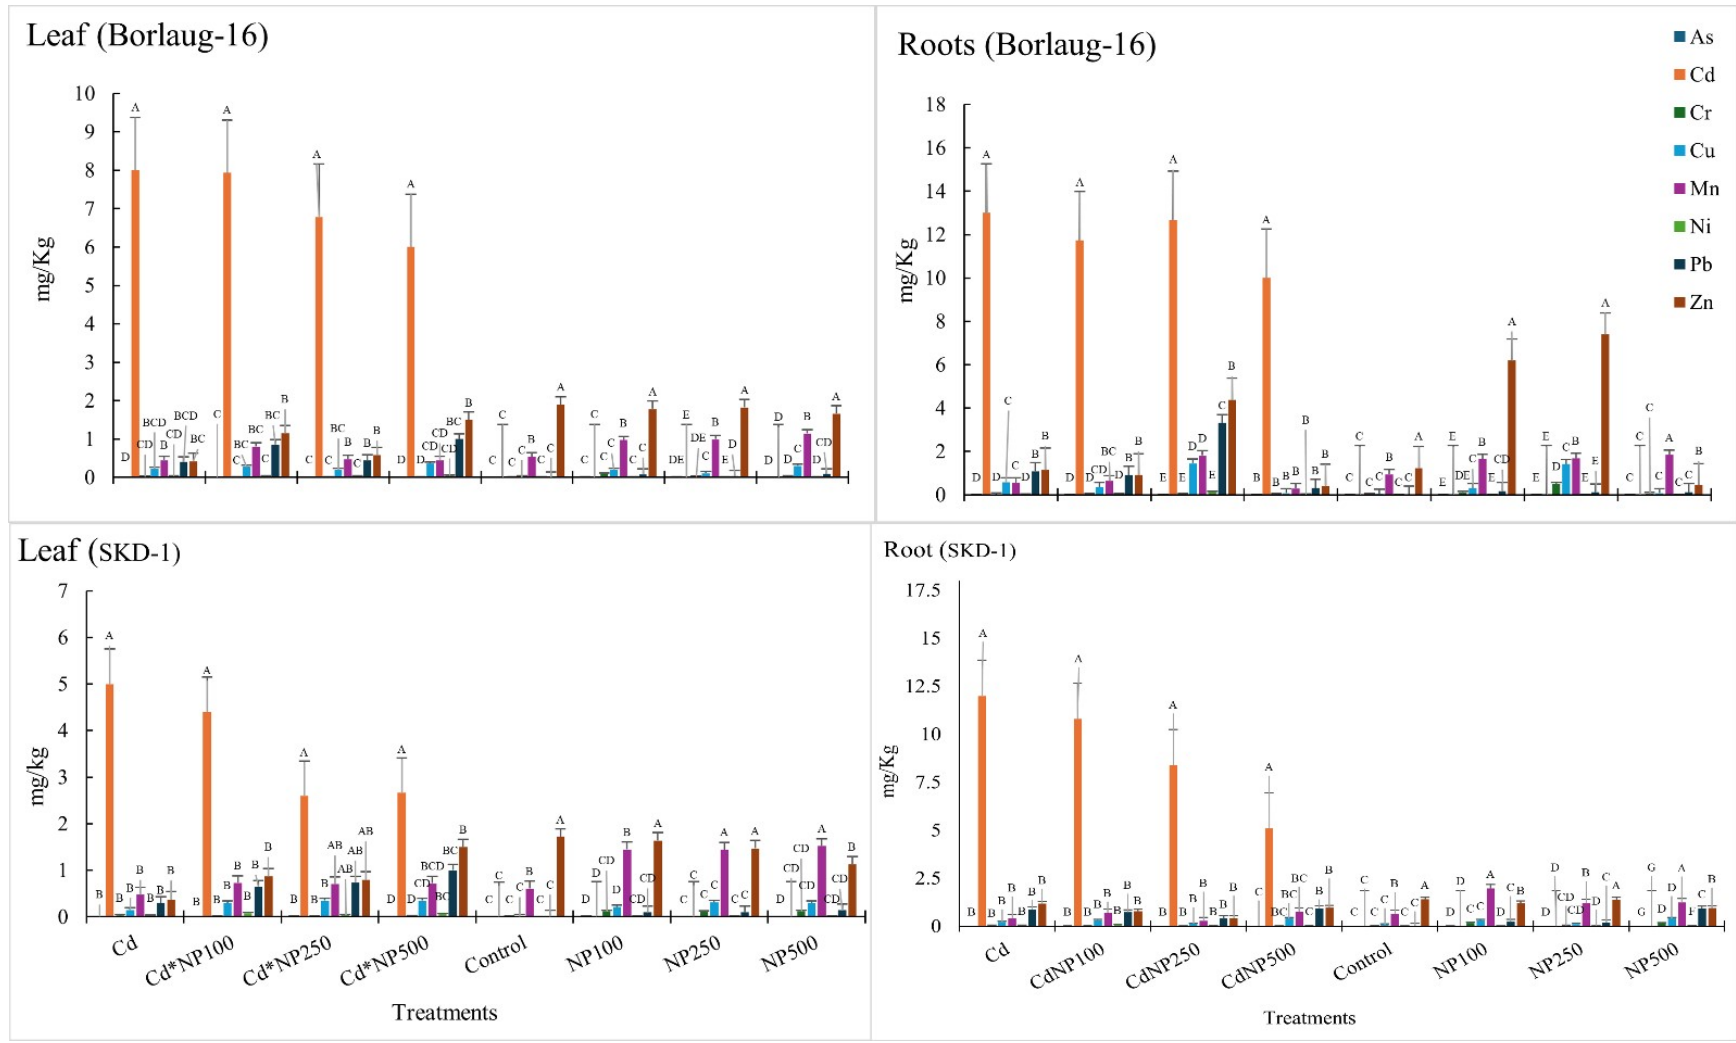

**Supplementary Figure 4: Uptake of Trace elements in leaf and root tissues of Borlaug-16 and SKD-1 cultivars.**

As: arsenic, Cd: cadmium, Cr: chromium, Cu: copper, Mn: manganese, Ni: nickel, Pb: lead, Zn: zinc.



Leaf (Borlaug-16)

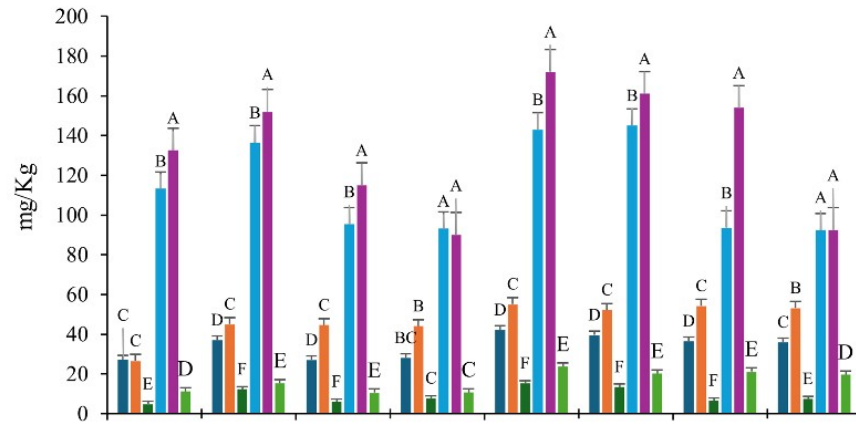

Roots (Borlaug-16)

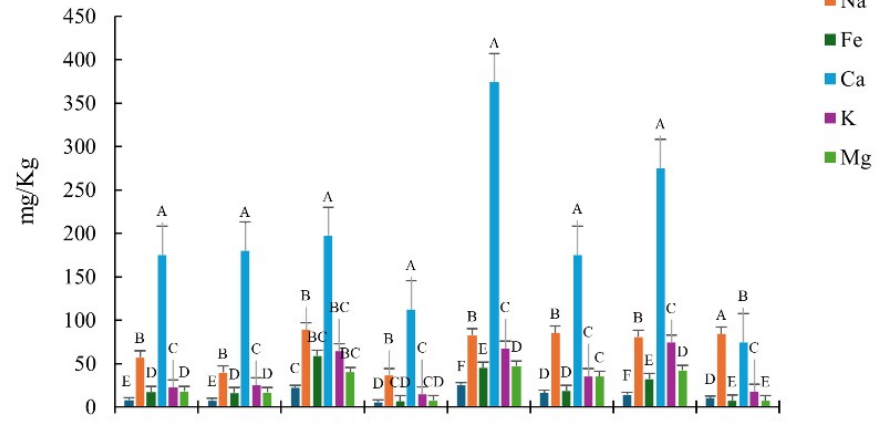

Leaf (SKD-1)

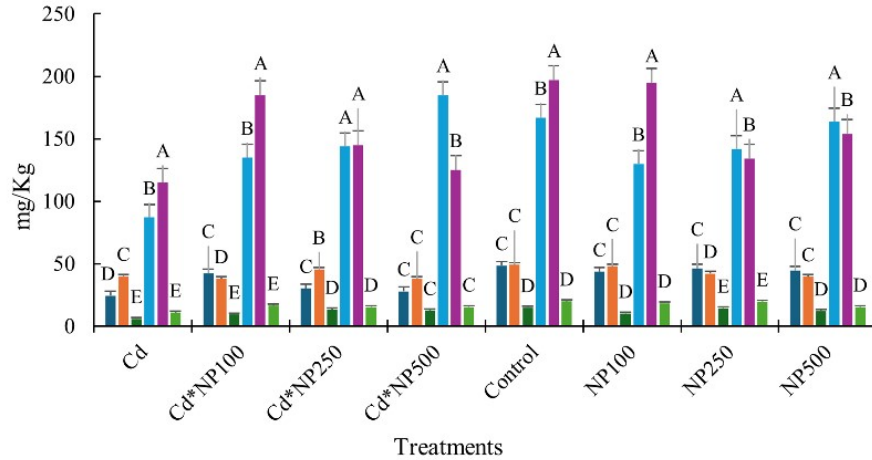

Roots (SKD-1)

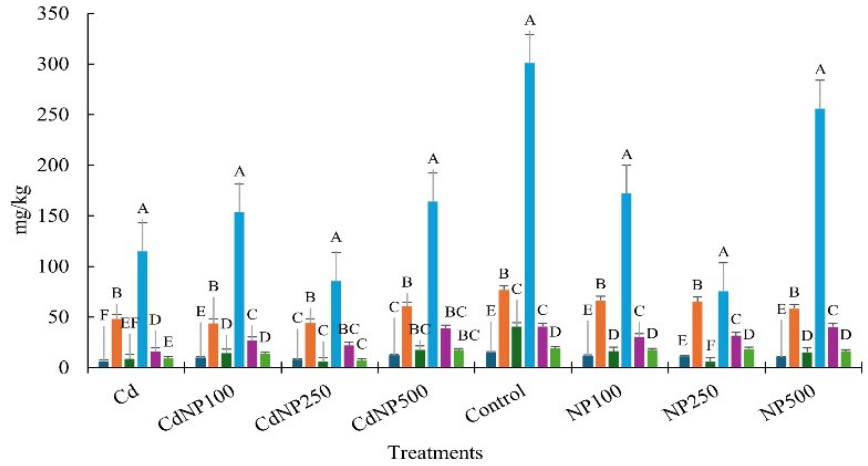

Supplementary Figure 5: Uptake of Mineral nutrients in leaf and root tissues of Borlaug-16 and SKD-1 cultivars.

P: phosphorous, Na: sodium, K: potassium, Mg: magnesium, Ca: calcium, Fe: iron.

```
=> Rp: 130.      Rwp: 109.      Rexp: 70.80      Chi2: 2.36
=> Global user-weighted Chi2 (Bragg contrib.): 5.304
=> -----> Pattern#      1
=> Phase:      1
=> Bragg R-factor: 11.71
=> RF-factor   : 6.902
=> Normal end, final calculations and writing...
```

```
=> CPU Time:    0.391 seconds
=> 0.007 minutes
```

```
=> END   Date:21/07/2024   Time => 22:28:50.310
```

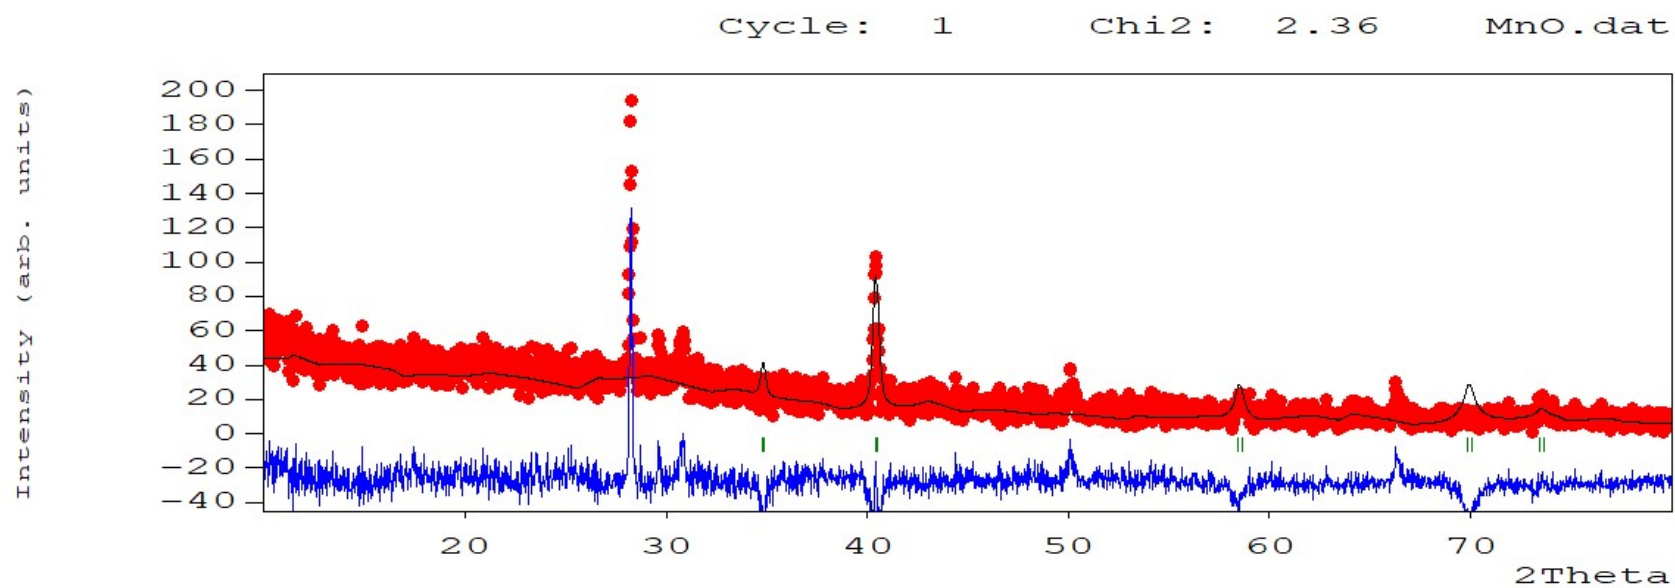

Supplementary Figure 6: X-ray powder diffraction patterns of MnO<sub>2</sub>NPs, both experimental and simulated, were refined using Rietveld analysis.
